# Supplementary material for: Distribution of lesions in psittacine birds naturally infected with parrot bornavirus in Japan
Source: PubMed Central journal article supplement — J Vet Med Sci. 2024 Sep 27;86(11):1110–8. doi: 10.1292/jvms.24-0061 (PMC11569871; doi:10.1292/jvms.24-0061), 2024-09-27
Supplement: jvms-86-1110-s001.pdf [file jvms-86-1110-s001.pdf]

Supplementary Table 1. Degree of mononuclear cell infiltration

| Case No. | Type             | Brain | Spinal cord | Peripheral nerve | Crop | Ventriculus | Intestine | Heart | Lungs | Liver | Kidney | Skin |
|----------|------------------|-------|-------------|------------------|------|-------------|-----------|-------|-------|-------|--------|------|
| 1        | neural           | +++   | ++          | ++               | +    | ++          | +         | +     | -     | -     | -      | -    |
| 2        | neural           | +++   | ++          | ++               | +    | ++          | +         | ++    | +     | -     | -      | -    |
| 3        | neural           | +++   | ND          | ND               | ND   | +           | +         | +++   | +     | -     | -      | ND   |
| 4        | neural           | +++   | ++          | +                | +    | +           | +         | +     | -     | -     | -      | +++  |
| 5        | neural           | +++   | ++          | -                | -    | ++          | -         | +     | -     | -     | -      | ND   |
| 6        | neural/digestive | +++   | +++         | ++               | +++  | +++         | ++        | ++    | +     | +     | -      | +    |
| 7        | neural/digestive | +++   | ++          | +                | ++   | +++         | ++        | ++    | -     | -     | +      | ++   |
| 8        | neural/digestive | +++   | +++         | ++               | ++   | +++         | +++       | +++   | ++    | -     | ++     | ++   |
| 9        | unclassified     | ++    | +           | -                | ++   | ++          | +         | -     | -     | -     | -      | ND   |
| 10       | neural/digestive | +++   | ++          | ++               | ++   | +++         | +++       | ++    | -     | -     | -      | +++  |
| 11       | neural/digestive | +++   | +           | ND               | ++   | +++         | ++        | ++    | -     | -     | -      | ND   |
| 12       | neural/digestive | +++   | ND          | ND               | -    | +++         | ND        | ++    | -     | -     | -      | ND   |
| 13       | digestive        | ++    | +++         | ++               | ++   | +++         | +++       | +++   | -     | -     | -      | ++   |
| 14       | digestive        | ++    | +++         | +                | ++   | +++         | +++       | ++    | +     | -     | -      | ++   |
| 15       | digestive        | ++    | +++         | ++               | +++  | +++         | +++       | ++    | +     | +     | -      | ++   |
| 16       | digestive        | ++    | ++          | +                | ++   | ++          | ++        | ++    | -     | -     | -      | +++  |
| 17       | digestive        | ++    | ++          | +                | ++   | +++         | +++       | ++    | -     | -     | -      | -    |
| 18       | digestive        | ++    | ND          | ND               | -    | +++         | ND        | -     | -     | -     | -      | ND   |

+++ : severe and diffuse, ++ : moderate and diffuse or severe and focal, + : mild and focal - : negative Abbreviations:ND, Not determined.

Supplementary Table 2. Scoring of microscopic findings

| Case No | Type             | Brain                |                          |               |                  | Spinal cord |                   |                   | Peripheral nerve |                   |                   | Crop  |                   | Ventriculus       |       | Intestine         |                   | Heart |                   | Lungs             |       | Liver             |                   | Kidney |                   | Skin              |       |                   |                   |       |    |    |    |    |    |    |
|---------|------------------|----------------------|--------------------------|---------------|------------------|-------------|-------------------|-------------------|------------------|-------------------|-------------------|-------|-------------------|-------------------|-------|-------------------|-------------------|-------|-------------------|-------------------|-------|-------------------|-------------------|--------|-------------------|-------------------|-------|-------------------|-------------------|-------|----|----|----|----|----|----|
|         |                  | Perivascular cuffing | Glial cell proliferation | Lesion spread | Kinds of lesions | Total       | Degree of lesions | Spread of lesions | Total            | Degree of lesions | Spread of lesions | Total | Degree of lesions | Spread of lesions | Total | Degree of lesions | Spread of lesions | Total | Degree of lesions | Spread of lesions | Total | Degree of lesions | Spread of lesions | Total  | Degree of lesions | Spread of lesions | Total | Degree of lesions | Spread of lesions | Total |    |    |    |    |    |    |
| 1       | neural           | 3                    | 3                        | 3             | 3                | 12          | 2                 | 1                 | 3                | 2                 | 1                 | 3     | 1                 | 1                 | 2     | 2                 | 2                 | 4     | 1                 | 1                 | 2     | 1                 | 1                 | 2      | 0                 | 0                 | 0     | 0                 | 0                 | 0     | 0  | 0  | 0  | 0  |    |    |
| 2       | neural           | 3                    | 3                        | 3             | 3                | 12          | 2                 | 2                 | 4                | 2                 | 1                 | 3     | 1                 | 1                 | 2     | 1                 | 2                 | 3     | 1                 | 1                 | 2     | 1                 | 2                 | 3      | 1                 | 1                 | 2     | 0                 | 0                 | 0     | 0  | 0  | 0  | 0  |    |    |
| 3       | neural           | 2                    | 3                        | 3             | 2                | 9           | ND                | ND                | ND               | ND                | ND                | ND    | ND                | ND                | 1     | 1                 | 2                 | ND    | ND                | ND                | ND    | ND                | ND                | ND     | ND                | ND                | ND    | ND                | ND                | ND    | ND | ND | ND | ND |    |    |
| 4       | neural           | 2                    | 3                        | 1             | 2                | 8           | ND                | ND                | ND               | ND                | ND                | ND    | ND                | ND                | 1     | 1                 | 2                 | ND    | ND                | ND                | ND    | ND                | ND                | ND     | ND                | ND                | ND    | ND                | ND                | ND    | ND | ND | ND |    |    |    |
| 5       | neural           | 3                    | 3                        | 3             | 3                | 12          | ND                | ND                | ND               | ND                | ND                | ND    | ND                | ND                | 2     | 2                 | 4                 | ND    | ND                | ND                | ND    | ND                | ND                | ND     | ND                | ND                | ND    | ND                | ND                | ND    | ND | ND | ND | ND |    |    |
| 6       | neural/digestive | 3                    | 3                        | 3             | 2                | 11          | 2                 | 3                 | 5                | 2                 | 1                 | 3     | 3                 | 3                 | 6     | 3                 | 3                 | 6     | 2                 | 2                 | 4     | 1                 | 2                 | 3      | 1                 | 1                 | 2     | 1                 | 1                 | 2     | 0  | 0  | 1  | 1  | 2  |    |
| 7       | neural/digestive | 3                    | 3                        | 3             | 3                | 12          | 2                 | 1                 | 3                | 1                 | 1                 | 2     | 2                 | 2                 | 4     | 2                 | 3                 | 5     | 2                 | 2                 | 4     | 2                 | 2                 | 4      | 0                 | 0                 | 0     | 0                 | 0                 | 1     | 1  | 2  | 1  | 2  | 3  |    |
| 8       | neural/digestive | 3                    | 3                        | 3             | 3                | 12          | 2                 | 3                 | 5                | 2                 | 2                 | 4     | 2                 | 2                 | 4     | 3                 | 3                 | 6     | 3                 | 3                 | 6     | 2                 | 3                 | 5      | 2                 | 1                 | 3     | 0                 | 0                 | 0     | 2  | 1  | 3  | 1  | 2  | 3  |
| 9       | unclassified     | 1                    | 2                        | 2             | 1                | 6           | ND                | ND                | ND               | ND                | ND                | ND    | ND                | ND                | 1     | 2                 | 3                 | ND    | ND                | ND                | ND    | ND                | ND                | ND     | ND                | ND                | ND    | ND                | ND                | ND    | ND | ND | ND | ND | ND |    |
| 10      | neural/digestive | 2                    | 2                        | 3             | 3                | 10          | ND                | ND                | ND               | ND                | ND                | ND    | ND                | ND                | 3     | 3                 | 6                 | ND    | ND                | ND                | ND    | ND                | ND                | ND     | ND                | ND                | ND    | ND                | ND                | ND    | ND | ND | ND | ND | ND |    |
| 11      | neural/digestive | 3                    | 2                        | 2             | 3                | 10          | ND                | ND                | ND               | ND                | ND                | ND    | ND                | ND                | 2     | 3                 | 5                 | ND    | ND                | ND                | ND    | ND                | ND                | ND     | ND                | ND                | ND    | ND                | ND                | ND    | ND | ND | ND | ND | ND | ND |
| 12      | neural/digestive | 3                    | 2                        | 3             | 2                | 10          | ND                | ND                | ND               | ND                | ND                | ND    | ND                | ND                | 3     | 3                 | 6                 | ND    | ND                | ND                | ND    | ND                | ND                | ND     | ND                | ND                | ND    | ND                | ND                | ND    | ND | ND | ND | ND | ND | ND |
| 13      | digestive        | 2                    | 1                        | 2             | 2                | 7           | 3                 | 3                 | 6                | 2                 | 1                 | 3     | 2                 | 1                 | 3     | 3                 | 6                 | 3     | 3                 | 6                 | 2     | 3                 | 5                 | 0      | 0                 | 0                 | 0     | 0                 | 0                 | 0     | 0  | 0  | 2  | 2  | 4  |    |
| 14      | digestive        | 1                    | 1                        | 2             | 1                | 5           | 2                 | 3                 | 5                | 1                 | 1                 | 2     | 1                 | 2                 | 3     | 2                 | 3                 | 5     | 2                 | 3                 | 5     | 2                 | 2                 | 4      | 1                 | 1                 | 2     | 0                 | 0                 | 0     | 0  | 0  | 1  | 2  | 3  |    |
| 15      | digestive        | 1                    | 2                        | 2             | 1                | 6           | 2                 | 3                 | 5                | 2                 | 1                 | 3     | 3                 | 3                 | 6     | 3                 | 3                 | 6     | 3                 | 3                 | 6     | 1                 | 3                 | 4      | 1                 | 1                 | 2     | 1                 | 1                 | 2     | 0  | 0  | 2  | 2  | 4  |    |
| 16      | digestive        | 1                    | 1                        | 2             | 1                | 5           | ND                | ND                | ND               | ND                | ND                | ND    | ND                | ND                | 1     | 3                 | 4                 | ND    | ND                | ND                | ND    | ND                | ND                | ND     | ND                | ND                | ND    | ND                | ND                | ND    | ND | ND | ND | ND | ND | ND |
| 17      | digestive        | 2                    | 1                        | 2             | 3                | 8           | ND                | ND                | ND               | ND                | ND                | ND    | ND                | ND                | 3     | 3                 | 6                 | ND    | ND                | ND                | ND    | ND                | ND                | ND     | ND                | ND                | ND    | ND                | ND                | ND    | ND | ND | ND | ND | ND | ND |
| 18      | digestive        | 2                    | 2                        | 2             | 1                | 7           | ND                | ND                | ND               | ND                | ND                | ND    | ND                | ND                | 3     | 2                 | 5                 | ND    | ND                | ND                | ND    | ND                | ND                | ND     | ND                | ND                | ND    | ND                | ND                | ND    | ND | ND | ND | ND | ND | ND |

Abbreviations:ND, Not determined.

Supplementary Table 3. Immunohistochemical scoring of parrot bornavirus (PaBV) antigens

| Case No | Type             | Brain             |                   |       | Spinal cord       |                   |       | Peripheral nerve  |                   |       | Crop              |                   |       | Ventriculus       |                   |       | Intestine         |                   |       | Heart             |                   |       | Lungs             |                   |       | Liver             |                   |       | Kidney            |                   |       | Skin |   |   |   |
|---------|------------------|-------------------|-------------------|-------|-------------------|-------------------|-------|-------------------|-------------------|-------|-------------------|-------------------|-------|-------------------|-------------------|-------|-------------------|-------------------|-------|-------------------|-------------------|-------|-------------------|-------------------|-------|-------------------|-------------------|-------|-------------------|-------------------|-------|------|---|---|---|
|         |                  | Degree of lesions | Spread of lesions | Total | Degree of lesions | Spread of lesions | Total | Degree of lesions | Spread of lesions | Total | Degree of lesions | Spread of lesions | Total | Degree of lesions | Spread of lesions | Total | Degree of lesions | Spread of lesions | Total | Degree of lesions | Spread of lesions | Total | Degree of lesions | Spread of lesions | Total | Degree of lesions | Spread of lesions | Total | Degree of lesions | Spread of lesions | Total |      |   |   |   |
| 1       | neural           | 3                 | 3                 | 6     | 3                 | 3                 | 6     | 2                 | 2                 | 4     | 0                 | 0                 | 0     | 0                 | 0                 | 0     | 0                 | 0                 | 0     | 2                 | 2                 | 4     | 0                 | 0                 | 0     | 0                 | 0                 | 0     | 0                 | 0                 | 0     | 0    | 1 | 1 | 2 |
| 2       | neural           | 3                 | 3                 | 6     | 2                 | 3                 | 5     | 2                 | 3                 | 5     | 1                 | 1                 | 2     | 1                 | 1                 | 2     | 1                 | 1                 | 2     | 2                 | 2                 | 4     | 0                 | 0                 | 0     | 0                 | 0                 | 0     | 0                 | 0                 | 0     | 0    | 1 | 1 | 2 |
| 6       | neural/digestive | 3                 | 3                 | 6     | 2                 | 3                 | 5     | 3                 | 3                 | 6     | 2                 | 3                 | 5     | 3                 | 3                 | 6     | 3                 | 3                 | 6     | 3                 | 3                 | 6     | 2                 | 3                 | 5     | 0                 | 0                 | 0     | 0                 | 0                 | 0     | 2    | 2 | 4 |   |
| 7       | neural/digestive | 2                 | 3                 | 5     | 2                 | 3                 | 5     | 2                 | 3                 | 5     | 2                 | 3                 | 5     | 3                 | 2                 | 5     | 2                 | 3                 | 5     | 2                 | 3                 | 5     | 2                 | 1                 | 3     | 0                 | 0                 | 0     | 0                 | 0                 | 0     | 0    | 3 | 2 | 5 |
| 8       | neural/digestive | 3                 | 3                 | 6     | 3                 | 3                 | 6     | 2                 | 2                 | 4     | 2                 | 3                 | 5     | 2                 | 3                 | 5     | 2                 | 3                 | 5     | 3                 | 3                 | 6     | 2                 | 2                 | 4     | 0                 | 0                 | 0     | 0                 | 0                 | 0     | 2    | 1 | 3 |   |
| 13      | digestive        | 2                 | 1                 | 3     | 2                 | 3                 | 5     | 2                 | 2                 | 4     | 2                 | 2                 | 4     | 3                 | 3                 | 6     | 3                 | 3                 | 6     | 3                 | 3                 | 6     | 2                 | 2                 | 4     | 0                 | 0                 | 0     | 0                 | 0                 | 0     | 3    | 1 | 4 |   |
| 14      | digestive        | 1                 | 2                 | 3     | 3                 | 3                 | 6     | 3                 | 2                 | 5     | 2                 | 3                 | 5     | 3                 | 3                 | 6     | 3                 | 3                 | 6     | 2                 | 3                 | 5     | 2                 | 3                 | 5     | 0                 | 0                 | 0     | 0                 | 0                 | 0     | 2    | 1 | 3 |   |
| 15      | digestive        | 2                 | 2                 | 4     | 3                 | 3                 | 6     | 2                 | 3                 | 5     | 2                 | 3                 | 5     | 3                 | 3                 | 6     | 3                 | 3                 | 6     | 3                 | 3                 | 6     | 2                 | 1                 | 3     | 0                 | 0                 | 0     | 0                 | 0                 | 0     | 2    | 2 | 4 |   |
